# Supplementary material for: Carrier concentration dependence of structural disorder in thermoelectric Sn1−xTe
Source: PubMed Central journal article supplement (PMC5391859; doi:10.1107/s2052252516012707), 2016-08-22
Supplement: m-03-00377-sup1.pdf [file m-03-00377-sup1.pdf]

## Supporting information

### S1. Sample characterization

#### S1.1. Hall coefficient and resistivity measurements

Hall and resistivity measurements on sample B have been performed with a PPMS (Physical Property Measurement System) from Quantum Design in the range 10 - 300 K. A bar of 8.442 mm x 3.596 mm x 0.63 mm was obtained from the ingot of sample B. The Au wires used for the resistivity measurement were placed 3.45 mm apart centered around the middle along the length of the sample. The Hall coefficient was calculated according to:

$$R_H = \frac{E_H}{jB} = \frac{V_H A}{IlB}$$

where  $E_H$  is the Hall field,  $B$  is the magnetic field,  $V_H$  is the Hall potential,  $j = I/A$  is the current density i.e. the current divided by the sample cross section, and  $l$  is the separation of the transverse voltage leads. The carrier concentration at 77 K was estimated through:

$$p_{77K} = -\frac{1}{R_{H,77K}e}$$

The same apparatus was used for electrical resistivity measurements.

#### S1.2. X-Ray diffraction

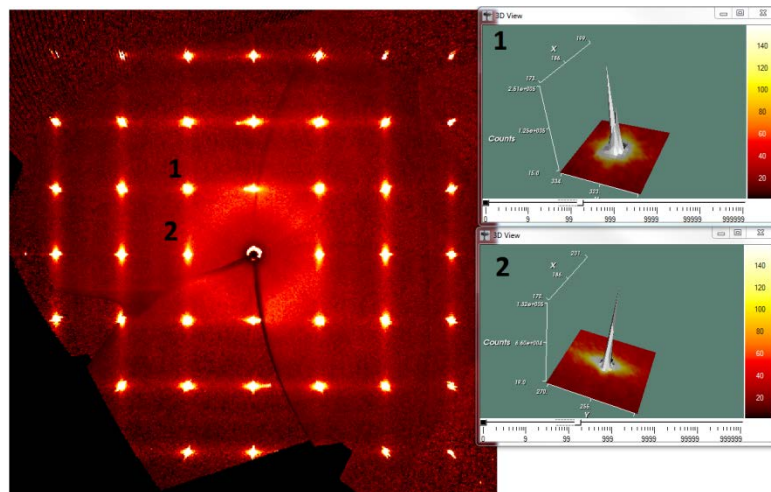

**Figure S1** Reconstruction of the (0kl) plane, sample A, at 300 K with enlargement on the (022) reflection (1) and on the (002) reflection (2) using an in-house Bruker II diffractometer.

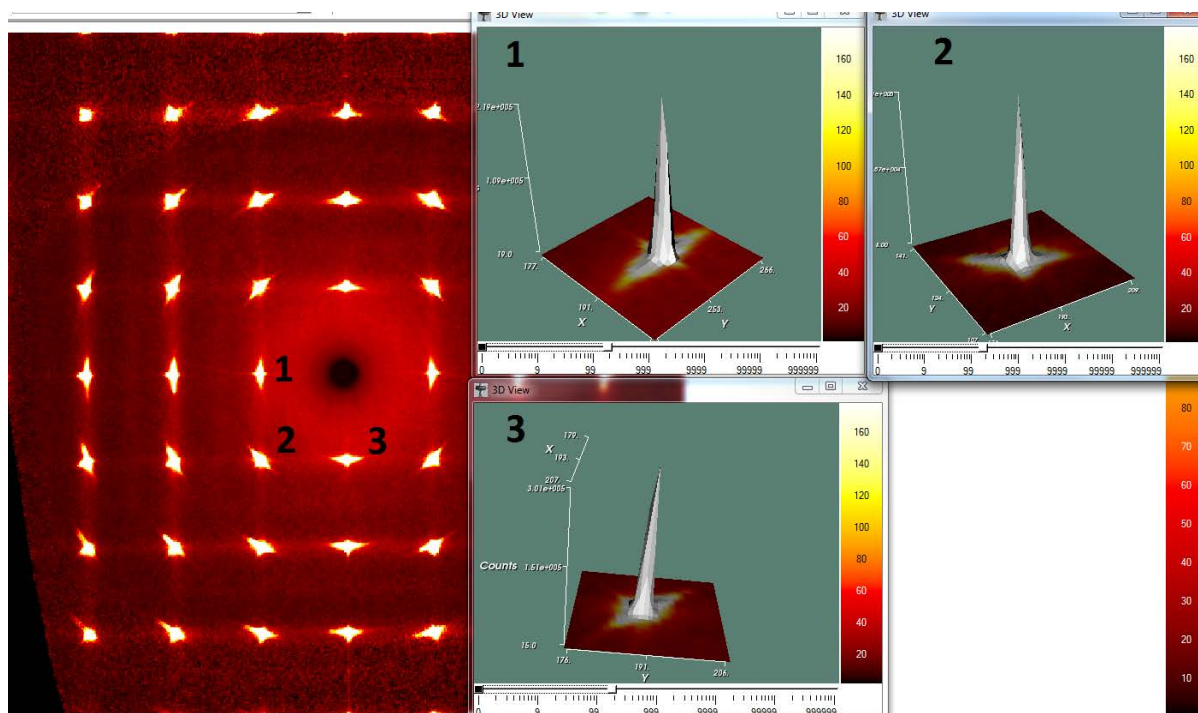

**Figure S2** Reconstruction of the  $(0kl)$  plane, sample B, at 300 K with enlargement on the  $(020)$  reflection (1), on the  $(022)$  reflection (2) and on the  $(002)$  reflection (3) using an in-house Bruker II diffractometer.

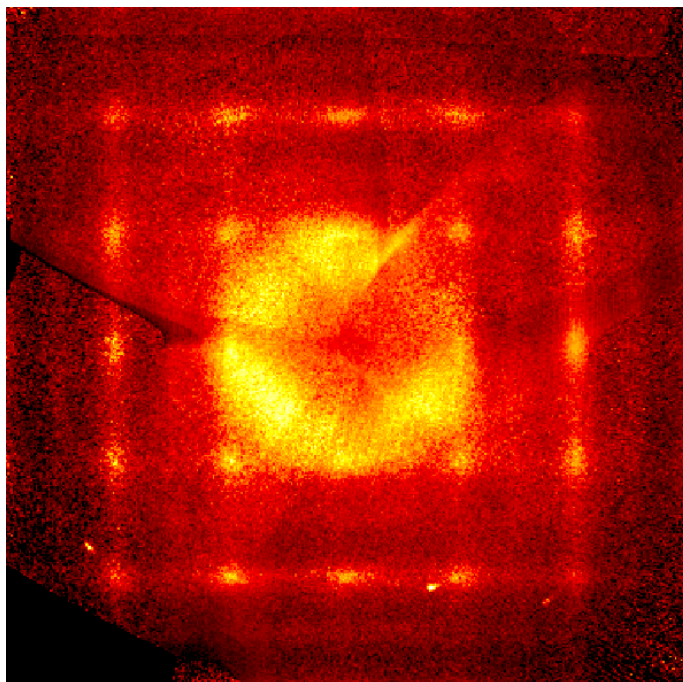

**Figure S3** Reconstruction of the (0.5kl) plane, sample A, at 300 K using an in-house Bruker II diffractometer.

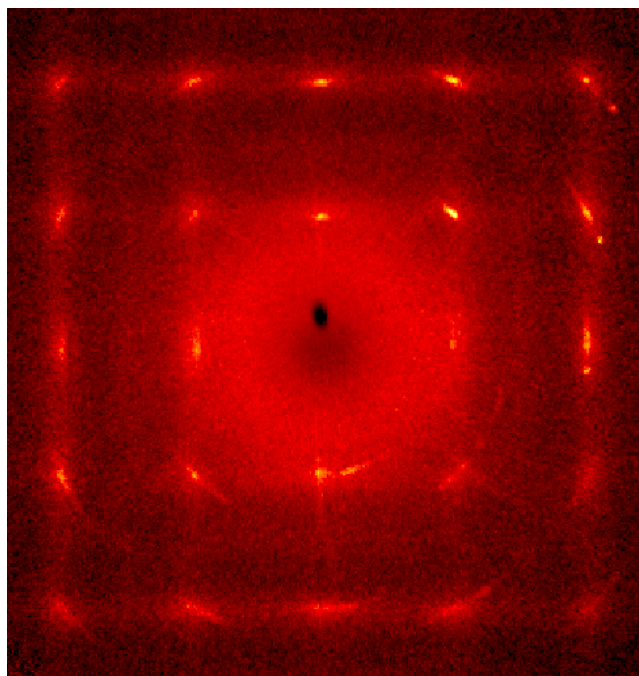

**Figure S4** Reconstruction of the (0.5kl) plane, sample B, at 300 K using an in-house Bruker II diffractometer.

Single crystal X-ray data collections on sample A and sample B were carried out at BL02B1, SPring8 using  $\omega$ -scans. For sample A frames were collected with  $\Delta\omega = 15^\circ$  and one frame with  $\Delta\omega = 5^\circ$  at T = 20 K, 200 K, 300 K, 400 K. Additionally 2 frames with  $\Delta\omega = 15^\circ$  were collected at 50 K, 75 K, 110 K. For sample B 10 frames with  $\Delta\omega=15^\circ$  and 3 frames with  $\Delta\omega = 5^\circ$  were collected at 20 K, 50 K, 80 K, 110 K, 200 K, 300 K. The data have been merged in Sortav.

Refinements have been carried out in Jana2006 in which:

$$R_{obs} = \frac{\sum_i \left| |F_i(obs)| - |F_i(calc)| \right|}{\sum_i |F_i(obs)|} \quad ; \quad wR_{obs} = \sqrt{\frac{\sum_i w_i (F_i(obs)^2 - F_i(calc)^2)^2}{\sum_i w_i F_i(obs)^4}} \quad ;$$

$$GOF = \sqrt{\frac{\sum_i w_i (|F_i(obs)| - |F_i(calc)|)^2}{n - p}}$$

**Table S1** Experimental details (sample A, single crystal)

|                                                               |                         |                        |                         |                         |                         |                         |                         |
|---------------------------------------------------------------|-------------------------|------------------------|-------------------------|-------------------------|-------------------------|-------------------------|-------------------------|
| Crystal system                                                | cubic                   |                        |                         |                         |                         |                         |                         |
| Space group                                                   | $Fm\bar{3}m$            |                        |                         |                         |                         |                         |                         |
| Z                                                             | 4                       |                        |                         |                         |                         |                         |                         |
| $\lambda$ (Å)                                                 | 0.49912                 |                        |                         |                         |                         |                         |                         |
| M (mm <sup>-1</sup> )                                         | 7.3                     |                        |                         |                         |                         |                         |                         |
| Crystal size<br>(equivalent<br>radius) (µm)                   | 40                      |                        |                         |                         |                         |                         |                         |
| ( $\sin\theta/\lambda$ ) <sub>max</sub><br>(Å <sup>-1</sup> ) | 1.2                     |                        |                         |                         |                         |                         |                         |
| Temperature<br>(K)                                            | 20                      | 50                     | 75                      | 110                     | 200                     | 300                     | 400                     |
| Empirical<br>Formula                                          | Sn <sub>0.9779</sub> Te | Sn <sub>0.977</sub> Te | Sn <sub>0.9789</sub> Te | Sn <sub>0.9798</sub> Te | Sn <sub>0.9787</sub> Te | Sn <sub>0.9795</sub> Te | Sn <sub>0.9803</sub> Te |
| Formula<br>weight                                             | 243.69                  | 243.58                 | 243.81                  | 243.91                  | 243.78                  | 243.88                  | 243.97                  |

| (g mol <sup>-1</sup> )                                        |            |            |            |            |            |            |            |
|---------------------------------------------------------------|------------|------------|------------|------------|------------|------------|------------|
| F <sub>000</sub>                                              | 403.58     | 403.40     | 403.78     | 403.96     | 403.74     | 403.9      | 404.06     |
| a (Å)                                                         | 6.2804(8)  | 6.282(2)   | 6.2871(17) | 6.2907(18) | 6.3017(10) | 6.314(1)   | 6.3226(11) |
| V (Å <sup>3</sup> )                                           | 247.72     | 247.91     | 248.51     | 248.94     | 250.25     | 251.66     | 252.75     |
| ρ, g cm <sup>-3</sup>                                         | 6.5340     | 6.5261     | 6.5163     | 6.5080     | 6.4705     | 6.4368     | 6.4115     |
| N <sub>measured</sub>                                         | 2006       | 344        | 520        | 347        | 2026       | 1982       | 2111       |
| N <sub>measured</sub> (I>3σ)                                  | 2006       | 344        | 518        | 347        | 2026       | 1982       | 2057       |
| N <sub>unique</sub>                                           | 125        | 96         | 113        | 111        | 127        | 127        | 126        |
| N <sub>unique</sub> (I>3σ)                                    | 125        | 96         | 108        | 102        | 127        | 127        | 126        |
| Average<br>redundancy                                         | 16.0       | 3.6        | 4.6        | 3.1        | 16         | 15.6       | 16.8       |
| Completeness<br>%                                             | 100        | 76.8       | 90.4       | 88.8       | 100        | 100        | 99.2       |
| R <sub>1</sub> =R <sub>merge</sub>                            | 0.0311     | 0.0454     | 0.0576     | 0.0358     | 0.0342     | 0.0238     | 0.0274     |
| R <sub>obs</sub> (I>3σ)                                       | 0.0130     | 0.0318     | 0.0302     | 0.0291     | 0.0142     | 0.0153     | 0.0105     |
| wR <sub>obs</sub> (I>3σ)                                      | 0.0182     | 0.0410     | 0.0268     | 0.0236     | 0.0153     | 0.0151     | 0.0121     |
| GOF (I>3σ)                                                    | 1.32       | 1.69       | 1.00       | 0.89       | 1.07       | 1.09       | 0.78       |
| Δρ (e Å <sup>-3</sup> )<br>(I>3σ)                             | -3.0 / 1.3 | -4.2 / 4.2 | -4.5 / 3.3 | -3.6 / 4.0 | -1.2 / 1.2 | -1.5 / 0.9 | -0.7 / 0.5 |
| Δρ (e Å <sup>-3</sup> )<br>(I>3σ) weight<br>scheme<br>applied | -2.0 / 0.4 | -3.7 / 2.9 | -2.9 / 2.8 | -2.4 / 2.0 | -0.8 / 0.4 | -1.1 / 0.6 | -0.4 / 0.2 |

**Table S2** Experimental details (sample B, single crystal)

|                                                          |                        |                        |                         |                         |                         |                         |
|----------------------------------------------------------|------------------------|------------------------|-------------------------|-------------------------|-------------------------|-------------------------|
| Crystal system                                           | cubic                  |                        |                         |                         |                         |                         |
| Space group                                              | $Fm\bar{3}m$           |                        |                         |                         |                         |                         |
| Z                                                        | 4                      |                        |                         |                         |                         |                         |
| $\lambda$ (Å)                                            | 0.49972                |                        |                         |                         |                         |                         |
| M (mm <sup>-1</sup> )                                    | 7.3                    |                        |                         |                         |                         |                         |
| Crystal size<br>(equivalent radius)<br>( $\mu\text{m}$ ) | 25                     |                        |                         |                         |                         |                         |
| $(\sin\theta/\lambda)_{\text{max}}$ (Å <sup>-1</sup> )   | 1.0                    |                        |                         |                         |                         |                         |
| Temperature (K)                                          | 20                     | 50                     | 80                      | 110                     | 200                     | 300                     |
| Empirical<br>Formula                                     | Sn <sub>0.973</sub> Te | Sn <sub>0.978</sub> Te | Sn <sub>0.9822</sub> Te | Sn <sub>0.9828</sub> Te | Sn <sub>0.9846</sub> Te | Sn <sub>0.9858</sub> Te |
| Formula weight (g<br>mol <sup>-1</sup> )                 | 243.10                 | 243.70                 | 244.20                  | 244.27                  | 244.48                  | 244.62                  |
| F <sub>000</sub>                                         | 402.60                 | 403.60                 | 404.44                  | 404.56                  | 404.92                  | 405.16                  |
| a (Å)                                                    | 6.2892(16)             | 6.2912(18)             | 6.295(2)                | 6.300(2)                | 6.312(2)                | 6.327(2)                |
| V (Å <sup>3</sup> )                                      | 248.76                 | 249.00                 | 249.45                  | 250.05                  | 251.48                  | 253.28                  |
| $\rho$ , g cm <sup>-3</sup>                              | 6.6701                 | 6.6714                 | 6.6672                  | 6.6717                  | 6.6748                  | 6.6849                  |
| N <sub>measured</sub>                                    | 1195                   | 1193                   | 1194                    | 1190                    | 1208                    | 1807                    |
| N <sub>measured</sub> (I>3 $\sigma$ )                    | 1194                   | 1190                   | 1194                    | 1187                    | 1207                    | 1796                    |
| N <sub>unique</sub>                                      | 78                     | 78                     | 77                      | 77                      | 77                      | 78                      |
| N <sub>unique</sub> (I>3 $\sigma$ )                      | 78                     | 78                     | 77                      | 77                      | 77                      | 78                      |
| Average<br>redundancy                                    | 15.3                   | 15.3                   | 15.5                    | 15.4                    | 15.7                    | 23.1                    |
| Completeness %                                           | 100                    | 100                    | 98.7                    | 98.7                    | 98.7                    | 98.7                    |
| R <sub>1</sub> =R <sub>merge</sub>                       | 0.0426                 | 0.0430                 | 0.0423                  | 0.0414                  | 0.0394                  | 0.0439                  |
| R <sub>obs</sub> (I>3 $\sigma$ )                         | 2.43                   | 2.32                   | 2.27                    | 2.37                    | 2.28                    | 2.16                    |
| wR <sub>obs</sub> (I>3 $\sigma$ )                        | 3.69                   | 3.30                   | 3.09                    | 3.33                    | 2.51                    | 2.67                    |
| GOF (I>3 $\sigma$ )                                      | 1.20                   | 1.05                   | 1.90                    | 2.12                    | 0.93                    | 1.73                    |
| $\Delta\rho$ (e Å <sup>-3</sup> ) (I>3 $\sigma$ )        | -2.1/4.1               | -2.0/4.0               | -2.0/3.5                | -2.1/4.3                | -1.9/2.7                | -1.4/1.9                |

| $\Delta\rho$ (e $\text{\AA}^{-3}$ ) ( $I > 3\sigma$ ) | -0.8/1.9 | -0.8/1.7 | -1.5/2.9 | -1.6/2.6 | -0.5/0.9 | -1.1/1.3 |
|-------------------------------------------------------|----------|----------|----------|----------|----------|----------|
| weight                                                |          |          |          |          |          |          |
| scheme                                                |          |          |          |          |          |          |
| applied                                               |          |          |          |          |          |          |

**Table S3** Extinction correction parameters as derived from Jana2006, harmonic model.

|                    |                                            |
|--------------------|--------------------------------------------|
| Sample A, 20 K     |                                            |
| Type 1, Lorentzian | $G_{\text{ISO}} = 0.007109 \pm 0.002369$   |
| Type 1, Gaussian   | $G_{\text{ISO}} = 0.006454 \pm 0.002068$   |
| Type 2             | $RHO_{\text{ISO}} = 0.040079 \pm 0.013945$ |
| Sample B, 20 K     |                                            |
| Type 1, Lorentzian | $G_{\text{ISO}} = 0.004580 \pm 0.0066$     |
| Type 1, Gaussian   | $G_{\text{ISO}} = 0.004262 \pm 0.0066011$  |
| Type 2             | $RHO_{\text{ISO}} = 0.026832 \pm 0.035168$ |

Conventional PXRD data were collected from 300 to 800 K on a Rigaku Smartlab equipped with a copper source. The measurements were executed in a closed system under Argon.

### S1.3. Differential thermal analysis (DTA)

DTA analysis has been performed with a Netsch STA 449 C Jupiter from 30 °C to 650 °C and back to 30 °C at a heating rate of 10 °C/min under Argon flux. The DTA curve shows a large broad partially irreversible exothermic transition. A small kink is visible at 233 °C which can be attributed to melting of metallic Sn which is present as a tiny impurity in the PXRD pattern.

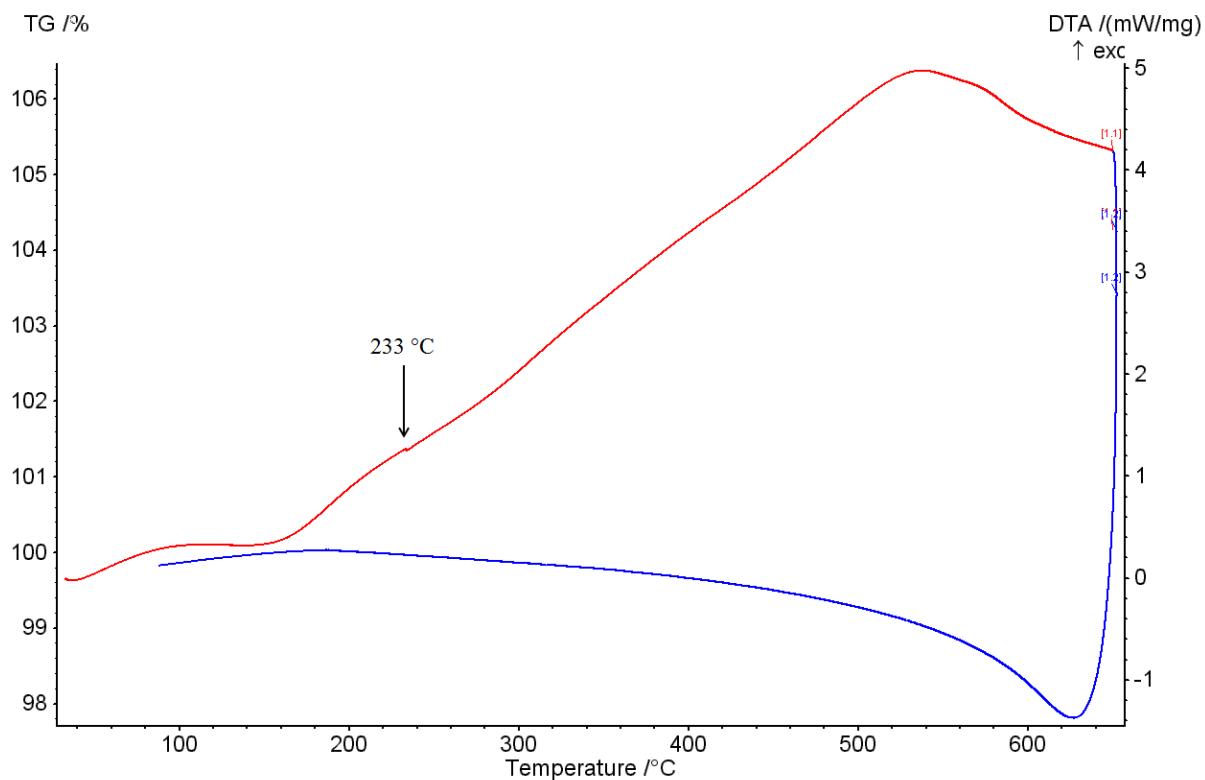

**Figure S5** DTA curve from 30 °C to 650 °C (red curve) and from 650 °C to 30 °C (blue curve). A broad exothermic transition appears at around 150 °C and continues for all the range of temperature considered. The small endothermic kink at 233 °C is due melting of the Sn impurity.



## S2. Results and discussions

### S2.1. Cell parameters

**Table S4** Thermal expansion with temperature for sample A and B (single crystal data)

Sample A

| T (K) | a (Å)      |
|-------|------------|
| 20    | 6.2804(8)  |
| 50    | 6.282(2)   |
| 75    | 6.2871(17) |
| 110   | 6.2907(18) |
| 200   | 6.3017(10) |
| 300   | 6.3135(10) |
| 400   | 6.3226(11) |

Sample B (single crystal data from 20 to 300 K, conventional PXRD data from 320 to 800 K)

| T (K) | a (Å)      |
|-------|------------|
| 20    | 6.2892(16) |
| 50    | 6.2912(18) |
| 80    | 6.295(2)   |
| 110   | 6.300(2)   |
| 200   | 6.312(2)   |
| 300   | 6.327(2)   |
| 320   | 6.32921(5) |
| 340   | 6.33156(5) |
| 360   | 6.33409(3) |
| 380   | 6.33664(4) |
| 400   | 6.33913(4) |

---

|     |            |
|-----|------------|
| 420 | 6.34206(4) |
| 440 | 6.34447(4) |
| 460 | 6.34652(4) |
| 480 | 6.34842(4) |
| 500 | 6.34916(4) |
| 520 | 6.34827(5) |
| 540 | 6.34777(5) |
| 560 | 6.34746(4) |
| 580 | 6.34889(3) |
| 600 | 6.35198(3) |
| 620 | 6.35619(4) |
| 640 | 6.35886(4) |
| 660 | 6.36205(1) |
| 680 | 6.36434(4) |
| 700 | 6.36693(5) |
| 720 | 6.37001(7) |
| 740 | 6.37166(6) |
| 760 | 6.37375(6) |
| 780 | 6.37610(6) |
| 800 | 6.37664(7) |

---

---

## S2.2. Harmonic model

**Table S5** Isotropic ADPs and site occupancy factor of Sn from the harmonic model

Sample A

| T (K) | $U_{\text{iso}} \text{ Sn } (\text{\AA}^2)$ | $U_{\text{iso}} \text{ Te } (\text{\AA}^2)$ | Occupancy(Sn) | $R_1$  | $R_{\text{obs}}$ | $wR_{\text{obs}}$ |
|-------|---------------------------------------------|---------------------------------------------|---------------|--------|------------------|-------------------|
| 20    | 0.00482(7)                                  | 0.00292(6)                                  | 0.9779(8)     | 0.0310 | 0.0130           | 0.0182            |
| 50    | 0.00597(16)                                 | 0.00349(14)                                 | 0.977(2)      | 0.0454 | 0.0318           | 0.0410            |
| 75    | 0.00752(11)                                 | 0.00449(9)                                  | 0.9789(12)    | 0.0576 | 0.0302           | 0.0268            |
| 110   | 0.00963(10)                                 | 0.00589(8)                                  | 0.9798(12)    | 0.0355 | 0.0291           | 0.0236            |
| 200   | 0.01509(6)                                  | 0.00967(5)                                  | 0.9787(8)     | 0.0342 | 0.0142           | 0.0153            |
| 300   | 0.02184(6)                                  | 0.01448(5)                                  | 0.9795(8)     | 0.0238 | 0.0153           | 0.0151            |
| 400   | 0.02858(5)                                  | 0.01931(4)                                  | 0.9803(7)     | 0.0274 | 0.0105           | 0.0121            |

Sample B

| T (K) | $U_{\text{iso}} \text{ Sn } (\text{\AA}^2)$ | $U_{\text{iso}} \text{ Te } (\text{\AA}^2)$ | Occupancy(Sn) | $R_1$  | $R_{\text{obs}}$ | $wR_{\text{obs}}$ |
|-------|---------------------------------------------|---------------------------------------------|---------------|--------|------------------|-------------------|
| 20    | 0.0091(2)                                   | 0.0063(2)                                   | 0.973(2)      | 0.0426 | 0.0245           | 0.0370            |
| 50    | 0.0099(2)                                   | 0.00734(19)                                 | 0.978(2)      | 0.0430 | 0.0234           | 0.0331            |
| 80    | 0.0114(2)                                   | 0.00841(18)                                 | 0.9822(18)    | 0.0423 | 0.0227           | 0.0309            |
| 110   | 0.01272(19)                                 | 0.00915(16)                                 | 0.9828(12)    | 0.0414 | 0.0237           | 0.0333            |
| 200   | 0.01752(19)                                 | 0.01217(17)                                 | 0.9846(12)    | 0.0400 | 0.0228           | 0.0251            |
| 300   | 0.02442(18)                                 | 0.01712(16)                                 | 0.9858(16)    | 0.0439 | 0.0216           | 0.0267            |

**S2.3. Anharmonic model****Table S6** Gram Charlier coefficients and site occupancy factor of Sn. Te is refined harmonically.

Sample A

| T (K) | $D_{1111}$ Sn ( $\text{\AA}^4$ ) | $D_{1122}$ Sn ( $\text{\AA}^4$ ) | Occupancy(Sn) |
|-------|----------------------------------|----------------------------------|---------------|
| 20    | 0.00015(3)                       | 0.000009(9)                      | 0.980(9)      |
| 50    | 0.00024(9)                       | -0.00000(5)                      | 0.980(3)      |
| 75    | 0.00014(6)                       | -0.000036(3)                     | 0.9797(14)    |
| 110   | 0.00008(9)                       | -0.00000(4)                      | 0.9802(15)    |
| 200   | 0.000010(5)                      | 0.000046(19)                     | 0.9801(10)    |
| 300   | 0.00005(6)                       | 0.00003(3)                       | 0.9799(10)    |
| 400   | -0.00020(9)                      | 0.00008(4)                       | 0.9797(9)     |

Sample B

| T (K) | $D_{1111}$ Sn ( $\text{\AA}^4$ ) | $D_{1122}$ Sn ( $\text{\AA}^4$ ) | Occupancy(Sn) |
|-------|----------------------------------|----------------------------------|---------------|
| 20    | 0.00072(16)                      | 0.00042(7)                       | 0.980(2)      |
| 50    | 0.00038(15)                      | 0.00030(6)                       | 0.984(2)      |
| 80    | 0.00014(12)                      | 0.00023(5)                       | 0.9860(19)    |
| 110   | 0.000067(15)                     | 0.00024(6)                       | 0.986(2)      |
| 200   | 0.00021(17)                      | 0.00019(8)                       | 0.9860(13)    |
| 300   | 0.00018(2)                       | 0.00020(9)                       | 0.9870(18)    |

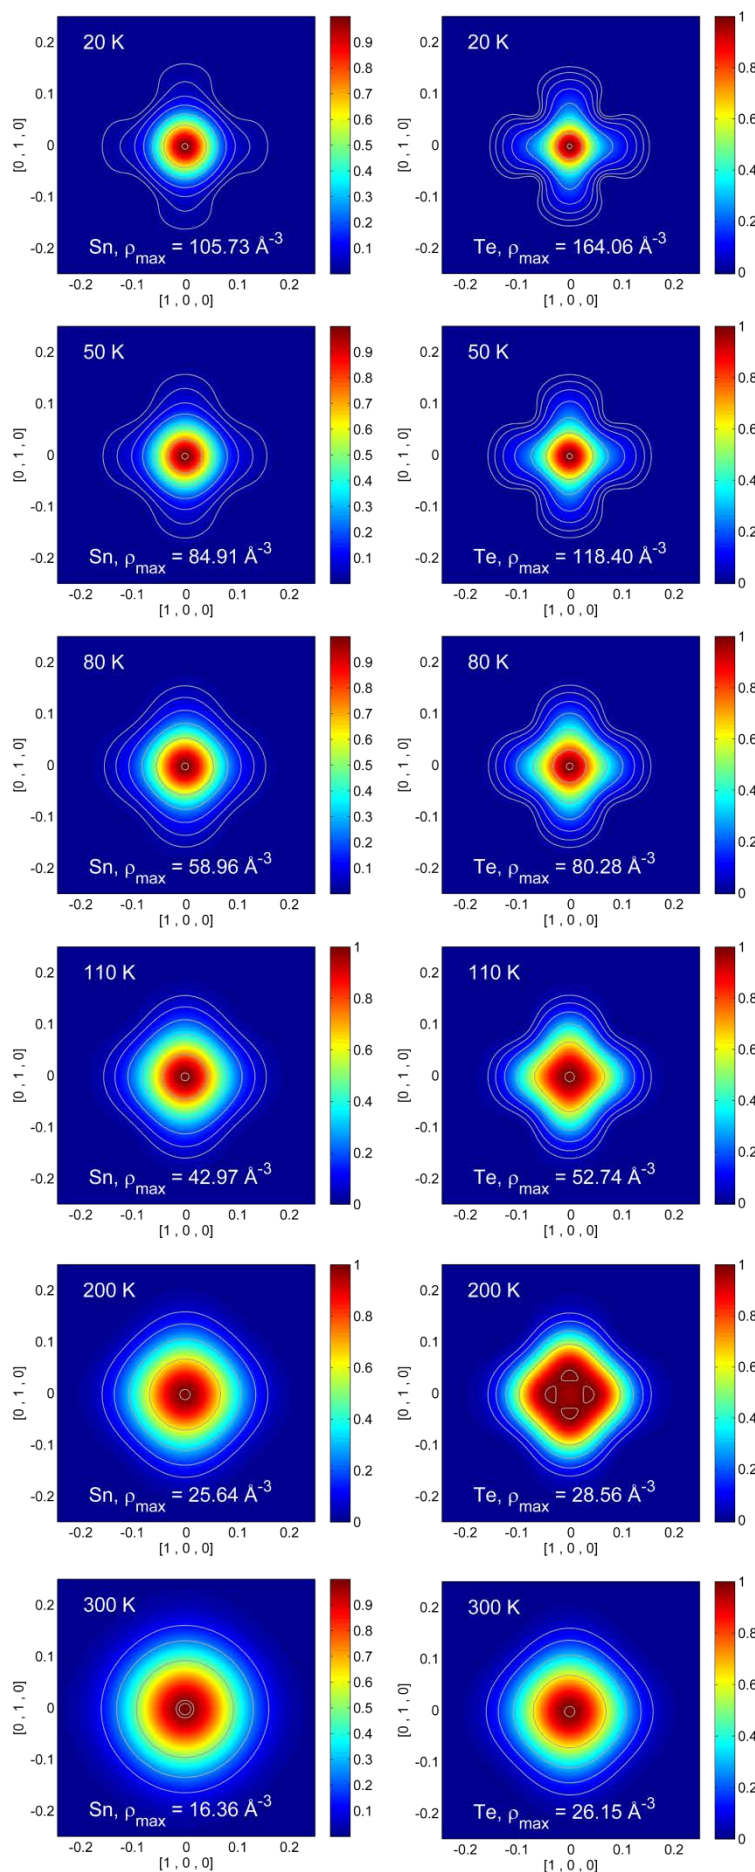

**Figure S6** Nuclear probability density functions for sample B in the anharmonic model with both Sn and Te refined through Gram-Charlier coefficients. Both Sn and Te have been translated in the (0,0) position. The plane of the map is the (001). The values have been normalized to 1 and the contour are plot as  $(2^n)/A$  where  $1 \leq n \leq 8$  and  $A$  is the unnormalized value of maximum of nuclear density. An additional contour has been added at 0.99 in the normalized scale to show the nuclear position. Despite the large correlations it is indicative to notice evident non-spherical features, especially for the Te atom. At 200 K the Te nuclear maxima are not in the high symmetry position.

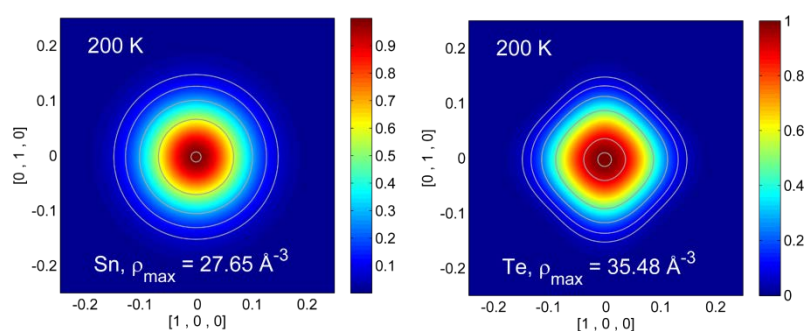

**Figure S7** Nuclear probability density functions for sample B at 200 K in the anharmonic model with Te refined through Gram-Charlier coefficients while keeping Sn harmonic. The maps have been plotted with the same settings as Figure S2.

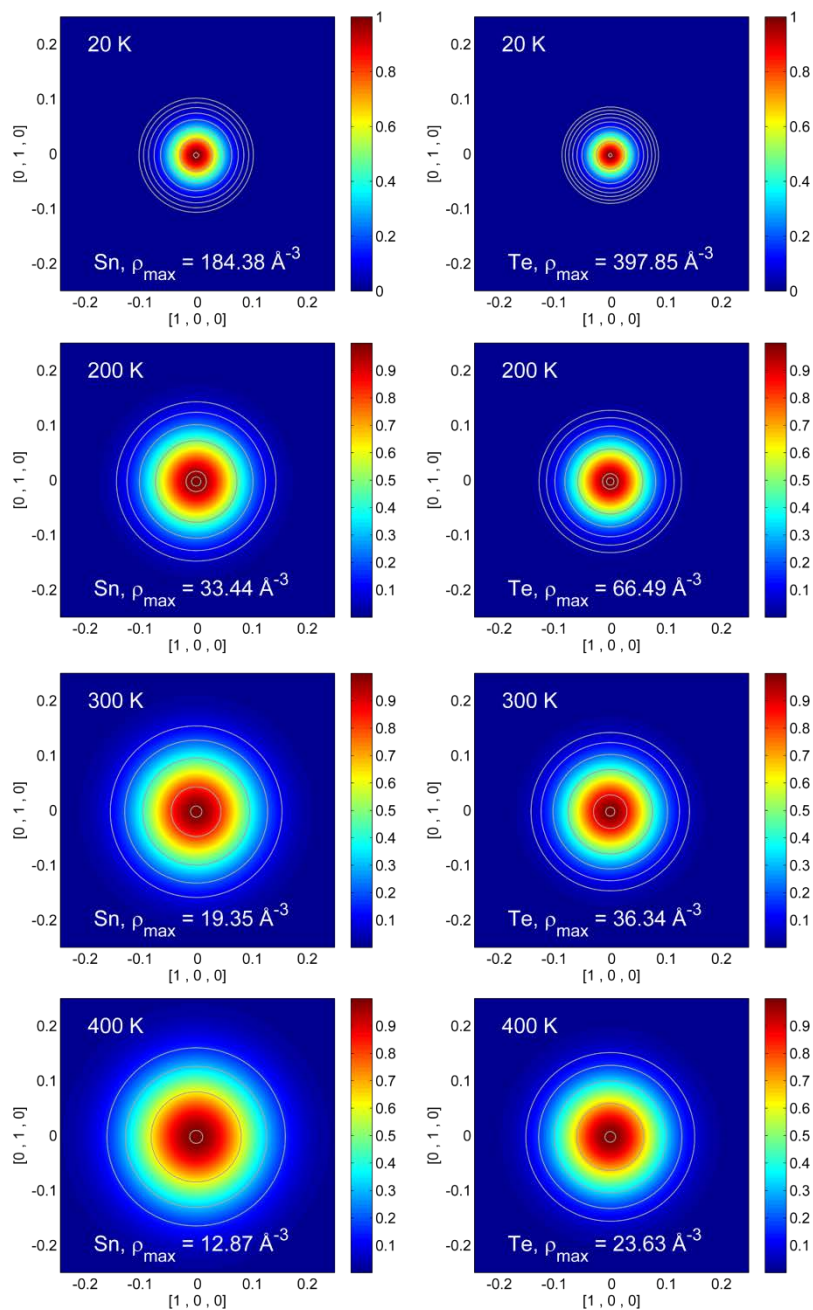

**Figure S8** Nuclear probability density functions for sample A in the anharmonic model with both Sn and Te refined with Gram-Charlier coefficients. The maps have been plotted with the same settings as Figure S2. No deviations from sphericity are seen for Sn and Te.

### S3.4 Maximum entropy method

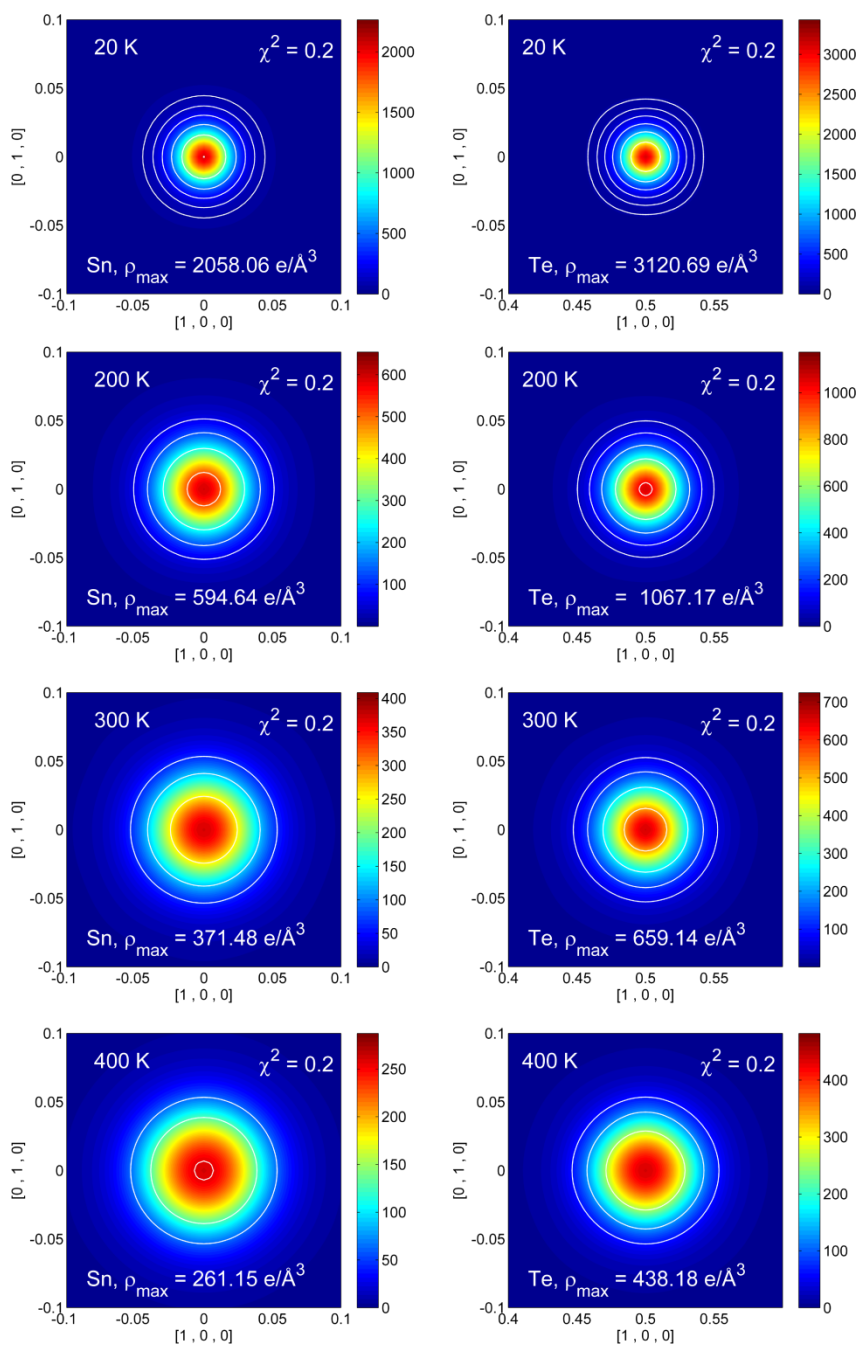

**Figure S9** MEM electron density maps of Sn (left) and Te (right) in the (001) plane from 20 to 400 K for sample A. Contour values have been set to [64, 128, 256, 512, 1024, 2048]  $e\text{\AA}^{-3}$ .



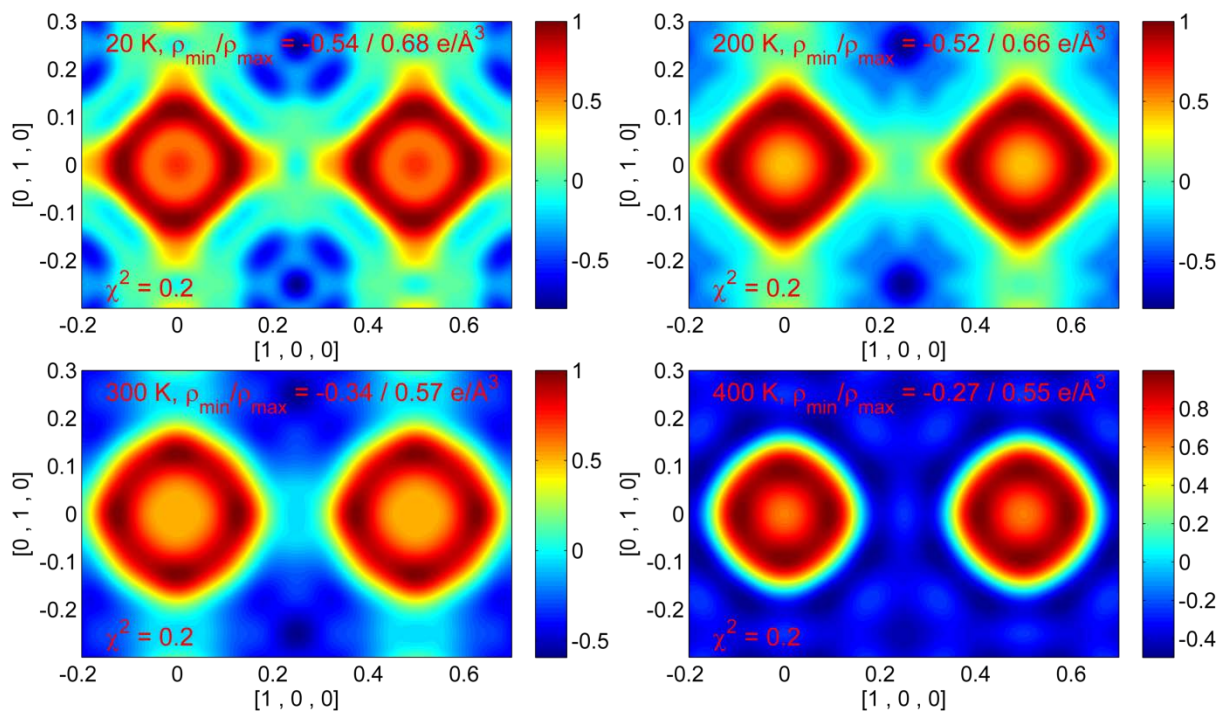

**Figure S10** Fourier difference ( $F_{\text{obs}} - F_{\text{MEM}}$ ) maps in the (100) plane at different temperatures for sample A. The values have been normalized between  $\Delta\rho_{\text{max}}$  and  $\Delta\rho_{\text{min}}$ .

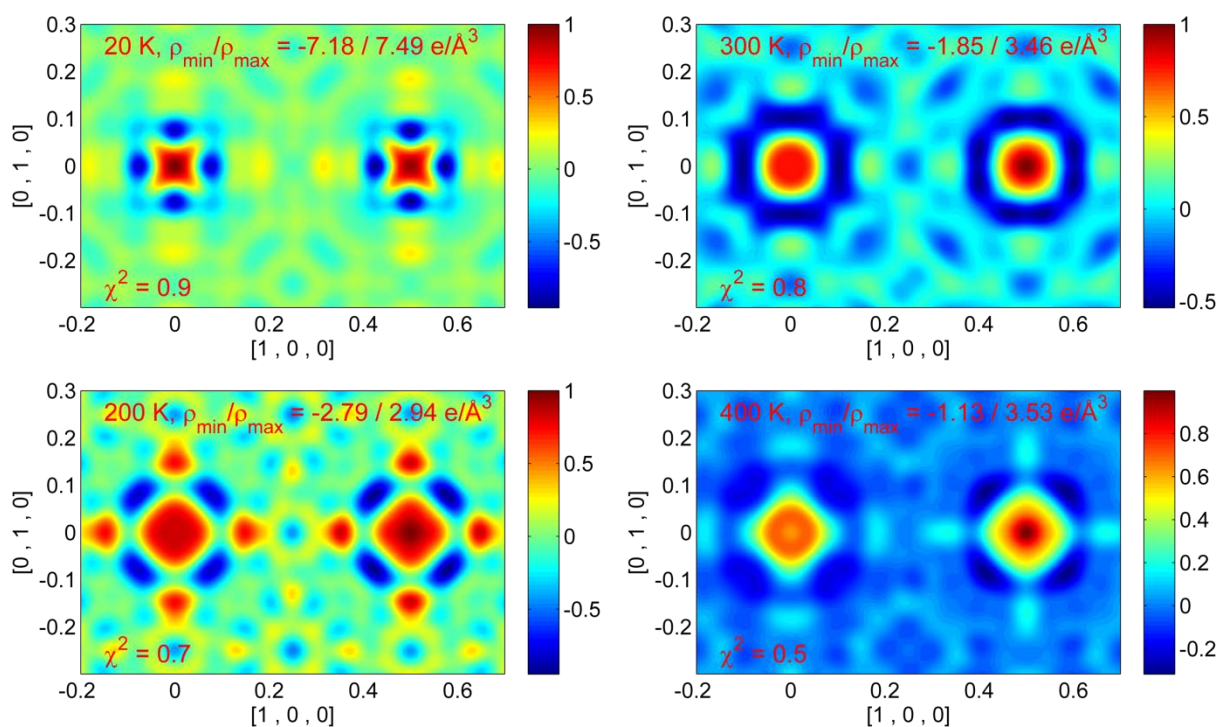

**Figure S11** Fourier difference ( $F_{\text{obs}} - F_{\text{NXMEM}}$ ) maps at different temperatures for sample A. The values have been normalized between  $\Delta\rho_{\text{max}}$  and  $\Delta\rho_{\text{min}}$ .

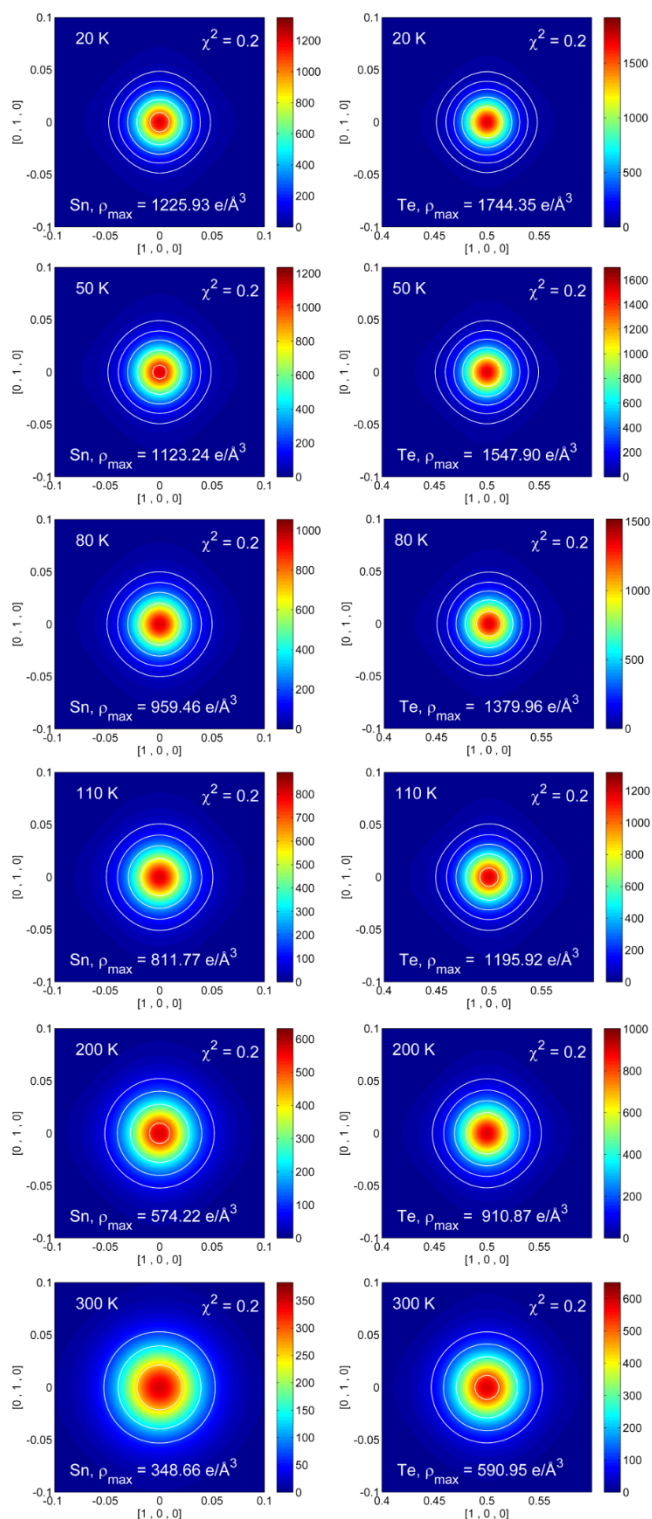

**Figure S12** MEM electron density maps of Sn (left) and Te (right) in the (001) plane from 20 to 300 K for sample B. Contour values have been set to [64, 128, 256, 512, 1024, 2048]  $e\text{\AA}^{-3}$ .

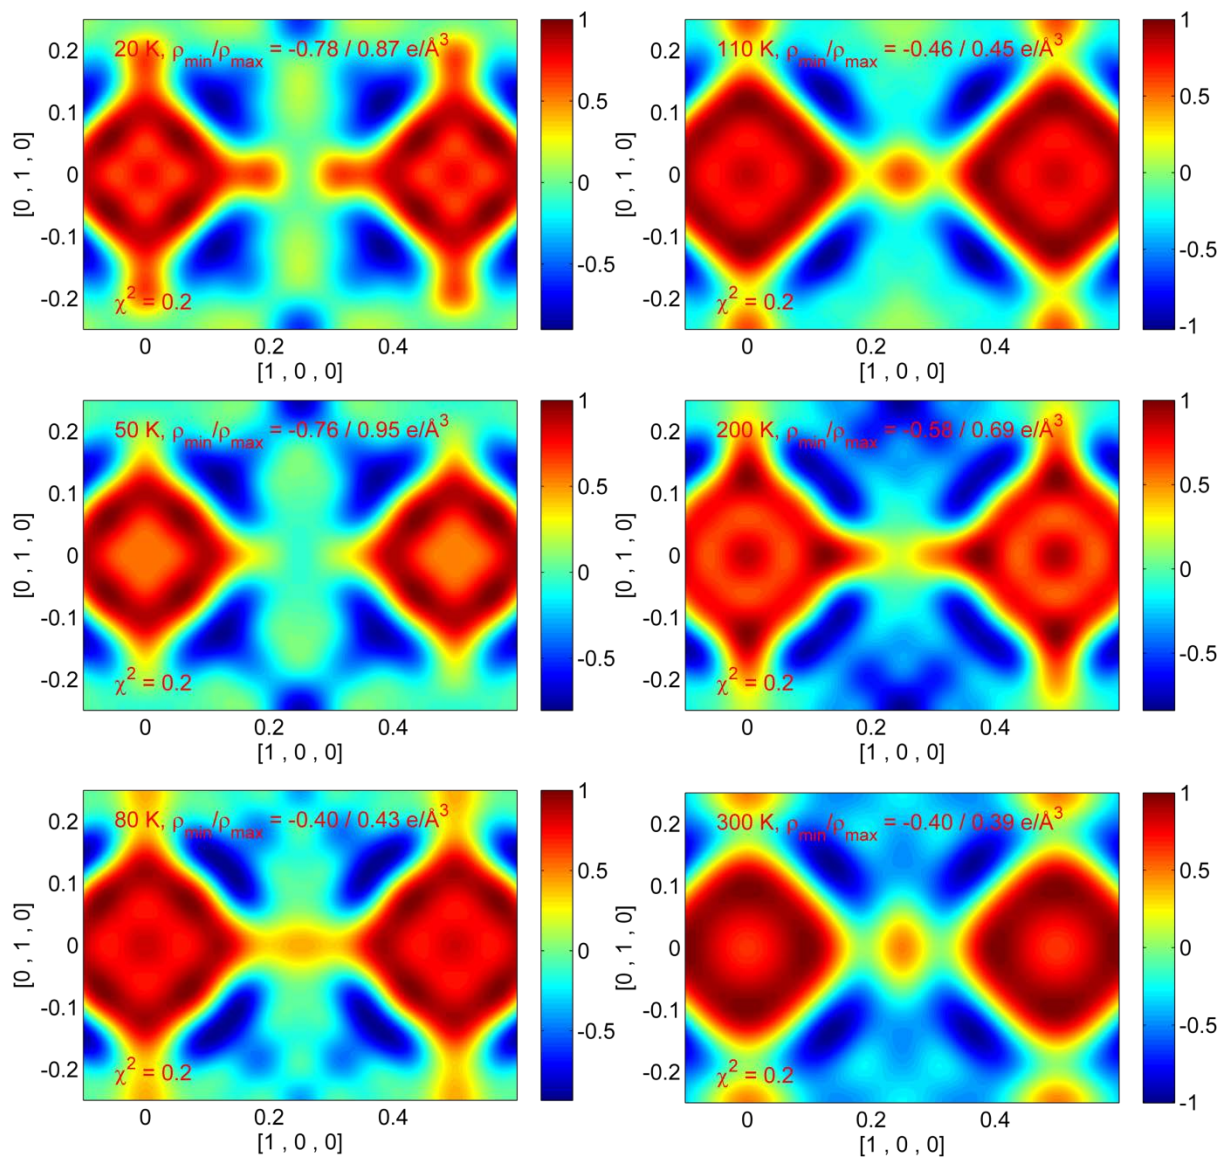

**Figure S13** Fourier difference ( $F_{\text{obs}} - F_{\text{MEM}}$ ) maps at different temperatures for sample B. The values have been normalized between  $\Delta\rho_{\text{max}}$  and  $\Delta\rho_{\text{min}}$ .

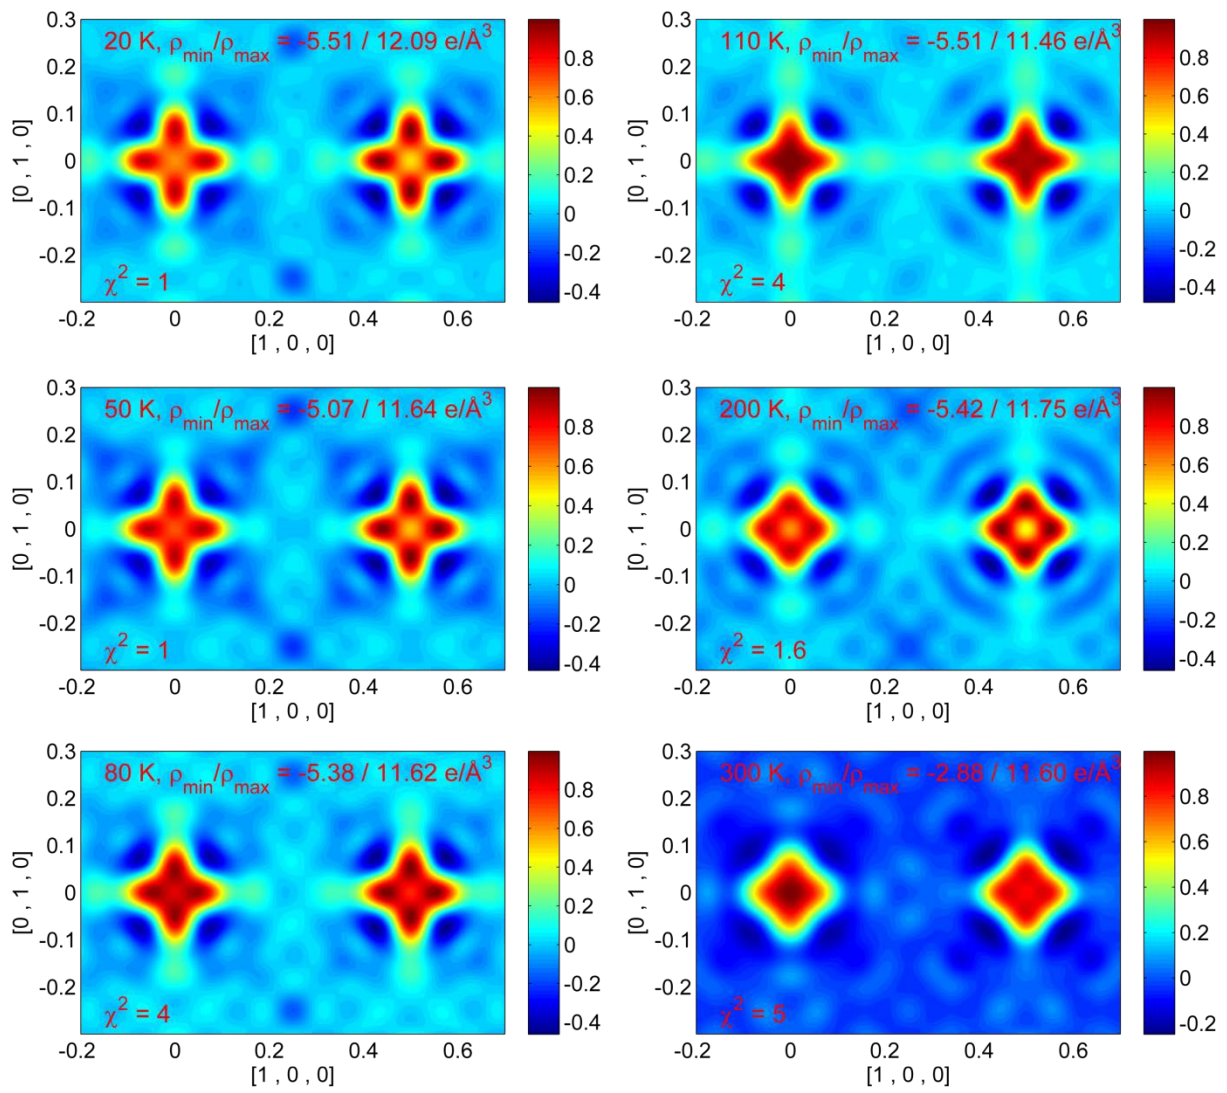

**Figure S14** Fourier difference ( $F_{\text{obs}} - F_{\text{NXMEM}}$ ) maps at different temperatures for sample B. The values have been normalized between  $\Delta\rho_{\text{max}}$  and  $\Delta\rho_{\text{min}}$ .

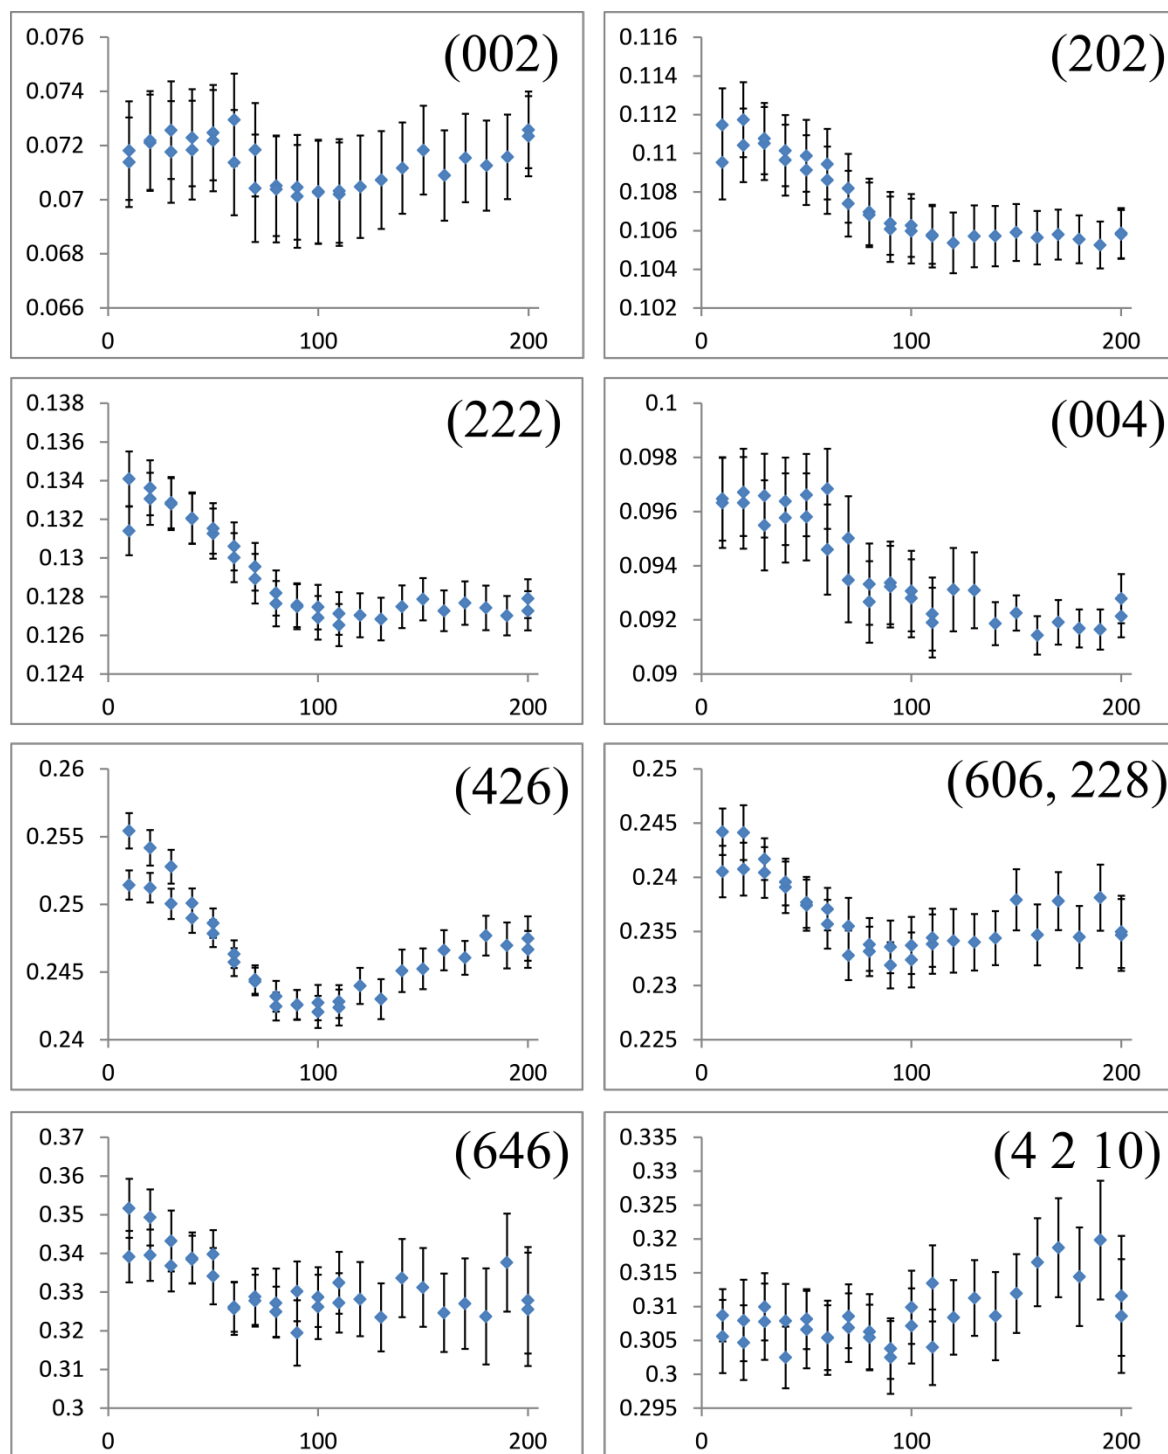

**Figure S15** Integral breadth  $\beta$  (deg), (y axis) as function of Temperature (K). The low order reflections show a slight broadening approaching 10 K. (002) and (004) should not split or broaden if a phase transition  $Fm\bar{3}m \rightarrow R3m$  occurs. At high  $2\theta$  values the broadening appears negligible.

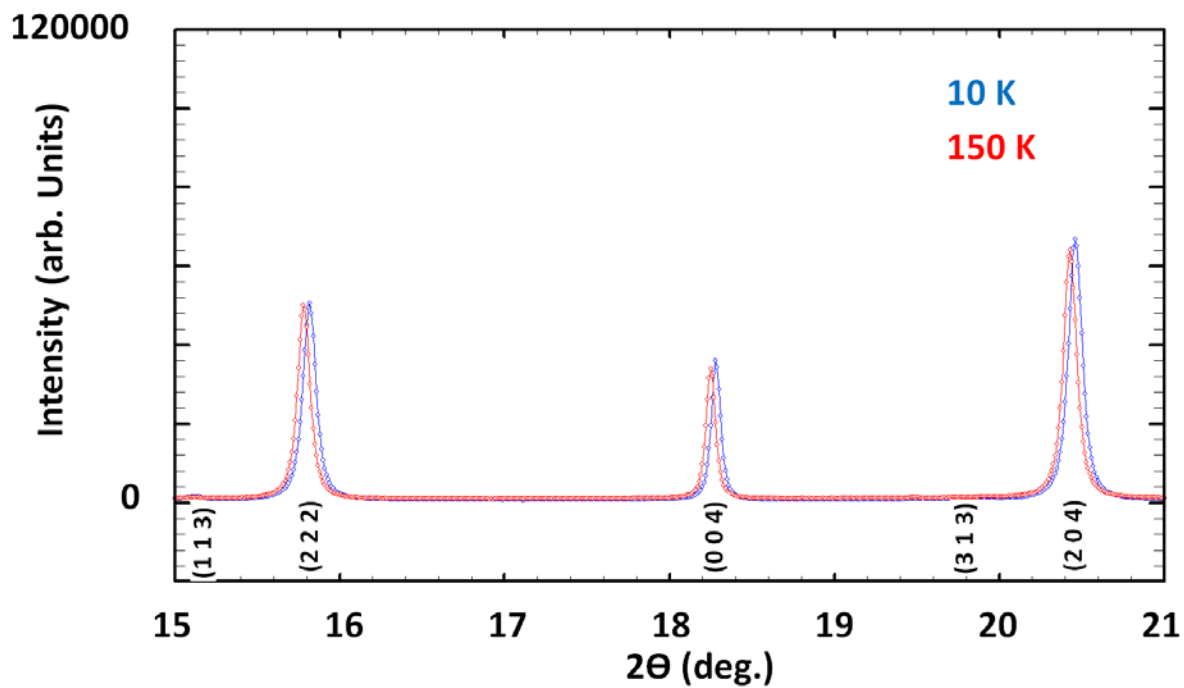

Figure S16 Comparison of low order reflections at 10 and 150 K.

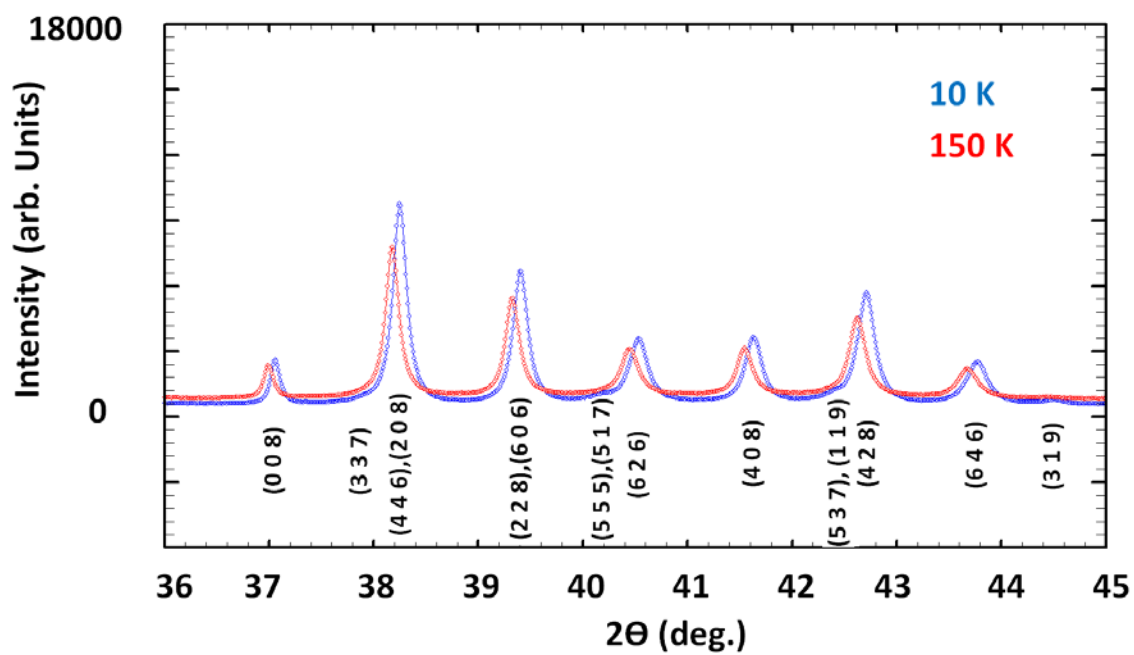

Figure S17 Comparison of high order reflections at 10 and 150 K.
